# Supplementary material
Source: publisher figshare collection journal article supplement (https://geolsoc.figshare.com/ndownloader/files/3580536)

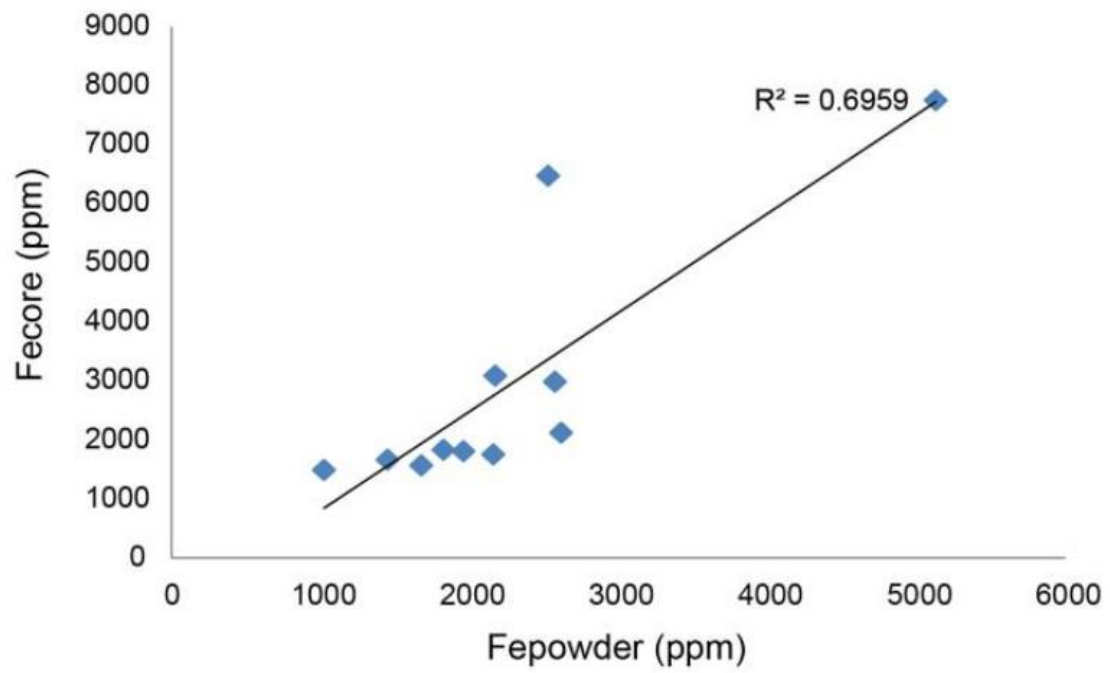

Figure: Cross-plot of Fe measurements acquired by HH-XRF on solid core vs on powder samples.

Supplement: Supplementary file 1 [file 3580536]
